# Supplementary material for: Smad3 deficiency improves islet-based therapy for diabetes and diabetic kidney injury by promoting β cell proliferation via the E2F3-dependent mechanism
Source: PubMed Central journal article supplement (PMC8690916; doi:10.7150/thno.67034), 2022-01-01
Supplement: thnov12p0379s1.pdf [file thnov12p0379s1.pdf]

**Smad3 deficiency improves islet-based therapy for diabetes and diabetic kidney injury by promoting  $\beta$  cell proliferation *via* the E2F3-dependent mechanism**

Hong-Lian Wang<sup>1,2</sup>, Biao Wei<sup>2</sup> Hui-Jun He<sup>2</sup>, Xiao-Ru Huang<sup>2,3</sup>, Jing-Yi Sheng<sup>2,4</sup>, Xiao-Cui Chen<sup>2,5</sup>, Li Wang<sup>1</sup>, Rui-Zhi Tan<sup>1</sup>, Jian-Chun Li<sup>1</sup>, Jian Liu<sup>1</sup>, Si-Jin Yang<sup>6</sup>, Ronald CW Ma<sup>2</sup>, and Hui-Yao Lan<sup>2,7\*</sup>

<sup>1</sup>Research Center for Integrated Medicine and Department of Nephrology, Affiliated Traditional Chinese Medicine Hospital of Southwest Medical University, Luzhou, Sichuan, 646000, China.

<sup>2</sup>Department of Medicine and Therapeutics, and Li Ka Shing Institute of Health Sciences, the Chinese University of Hong Kong, Hong Kong, 999077, China.

<sup>3</sup>Guangdong-Hong Kong Joint Laboratory on Immunological and Genetic Kidney Diseases, Guangdong Provincial People's Hospital, Guangdong Academy of Medical Sciences, Guangzhou, Guangdong, 510080, China.

<sup>4</sup>State Key Laboratory of Bioelectronics, Jiangsu Key Laboratory for Biomaterials and Devices, School of Biological Sciences & Medical Engineering, Southeast University, Nanjing, China

<sup>5</sup>Key Laboratory of Prevention and Management of Chronic Kidney Disease of Zhanjiang City, Institute of Nephrology, Affiliated Hospital of Guangdong Medical University, Zhanjiang, Guangdong, 524001, China

<sup>6</sup>National Traditional Chinese Medicine Clinical Research Base, Affiliated Traditional Chinese Medicine Hospital of Southwest Medical University, Luzhou, Sichuan, 646000, China

<sup>7</sup>CUHK-Guangdong Provincial People's Hospital Joint Research Laboratory on Immunological and Genetic Kidney Diseases, the Chinese University of Hong Kong, Hong Kong, 999077, China

**\*Correspondence** to Prof. Hui-Yao Lan, Li Ka Shing Institute of Health Sciences, the Prince of Wales Hospital, Shatin, Hong Kong SAR, China. Address: Prince of Wales Hospital, Shatin, N.T. Hong Kong SAR, China. Tel: +852-37636061, E-mail: [hylan@cuhk.edu.hk](mailto:hylan@cuhk.edu.hk).

## Supplementary Figures and Tables

—■— STZ + sham, n = 6      —●— STZ + 50 S3WT islet, n = 6      —▲— STZ + 100 S3WT islet, n = 6      —◆— STZ + 200 S3WT islet, n = 5  
 —■— Non-diabetic control, n = 6      —●— STZ + 50 S3KO islet, n = 6      —▲— STZ + 100 S3KO islet, n = 5      —◆— STZ + 200 S3KO islet, n = 6

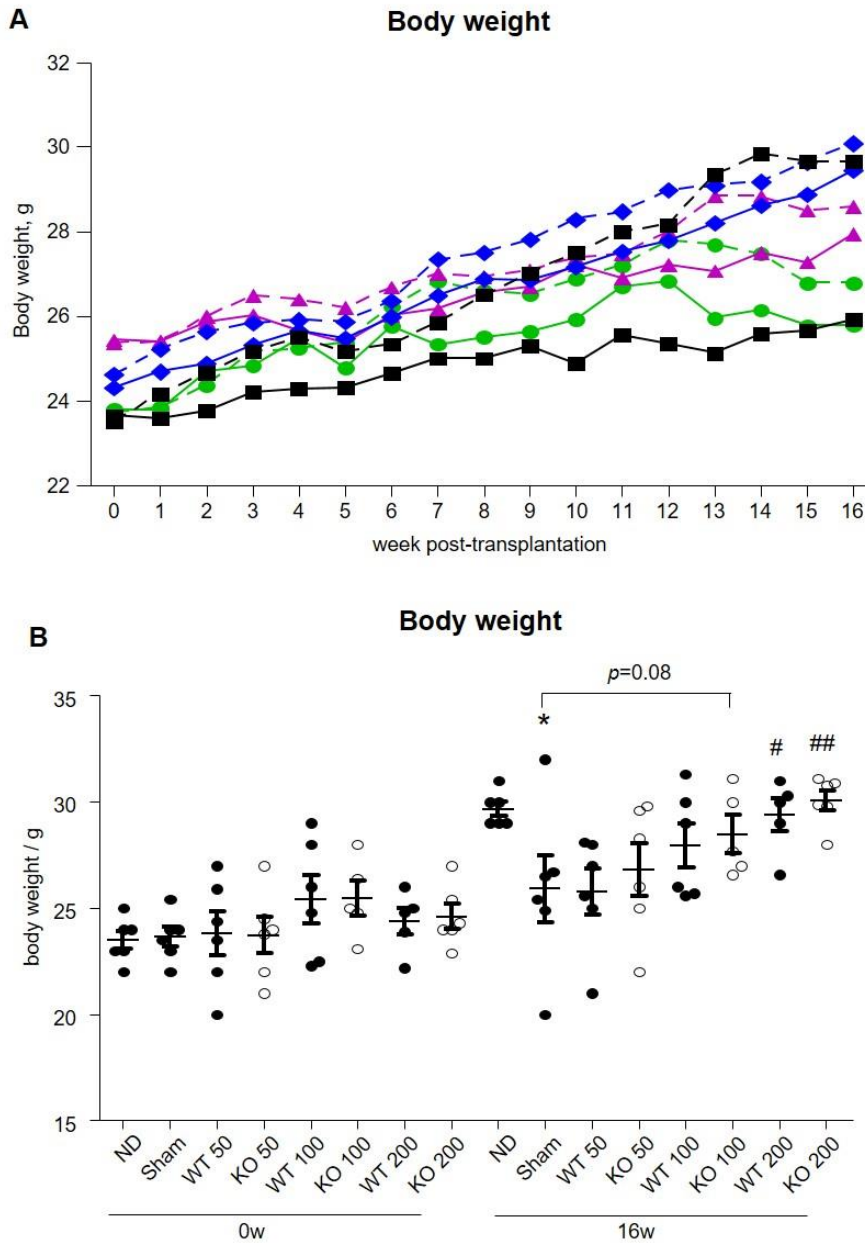

**Figure S1. Effect of Smad3KO or WT islet transplantation on body weight in STZ-induced diabetic mice.** (A) The mean value of weekly body weight over 16 weeks. (B) Body weight of mice before (0 week) and after islet therapy at week 16. Each dot represents one animal. ND, non-diabetic normal control. \* $p < 0.05$  versus the age-matched normal control (ND). # $p < 0.05$  and ## $p < 0.01$  versus the age-matched Sham group.

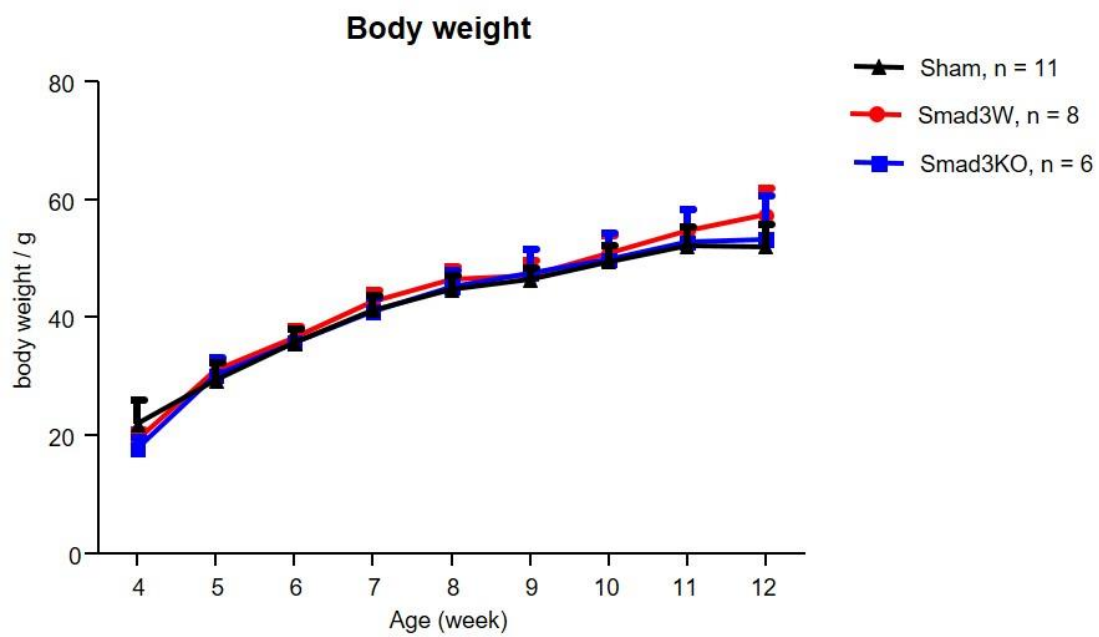

**Figure S2. Transplantation of Smad3KO or Smad3WT islets doesn't influence the gain of body weight of recipient db/db mice.**

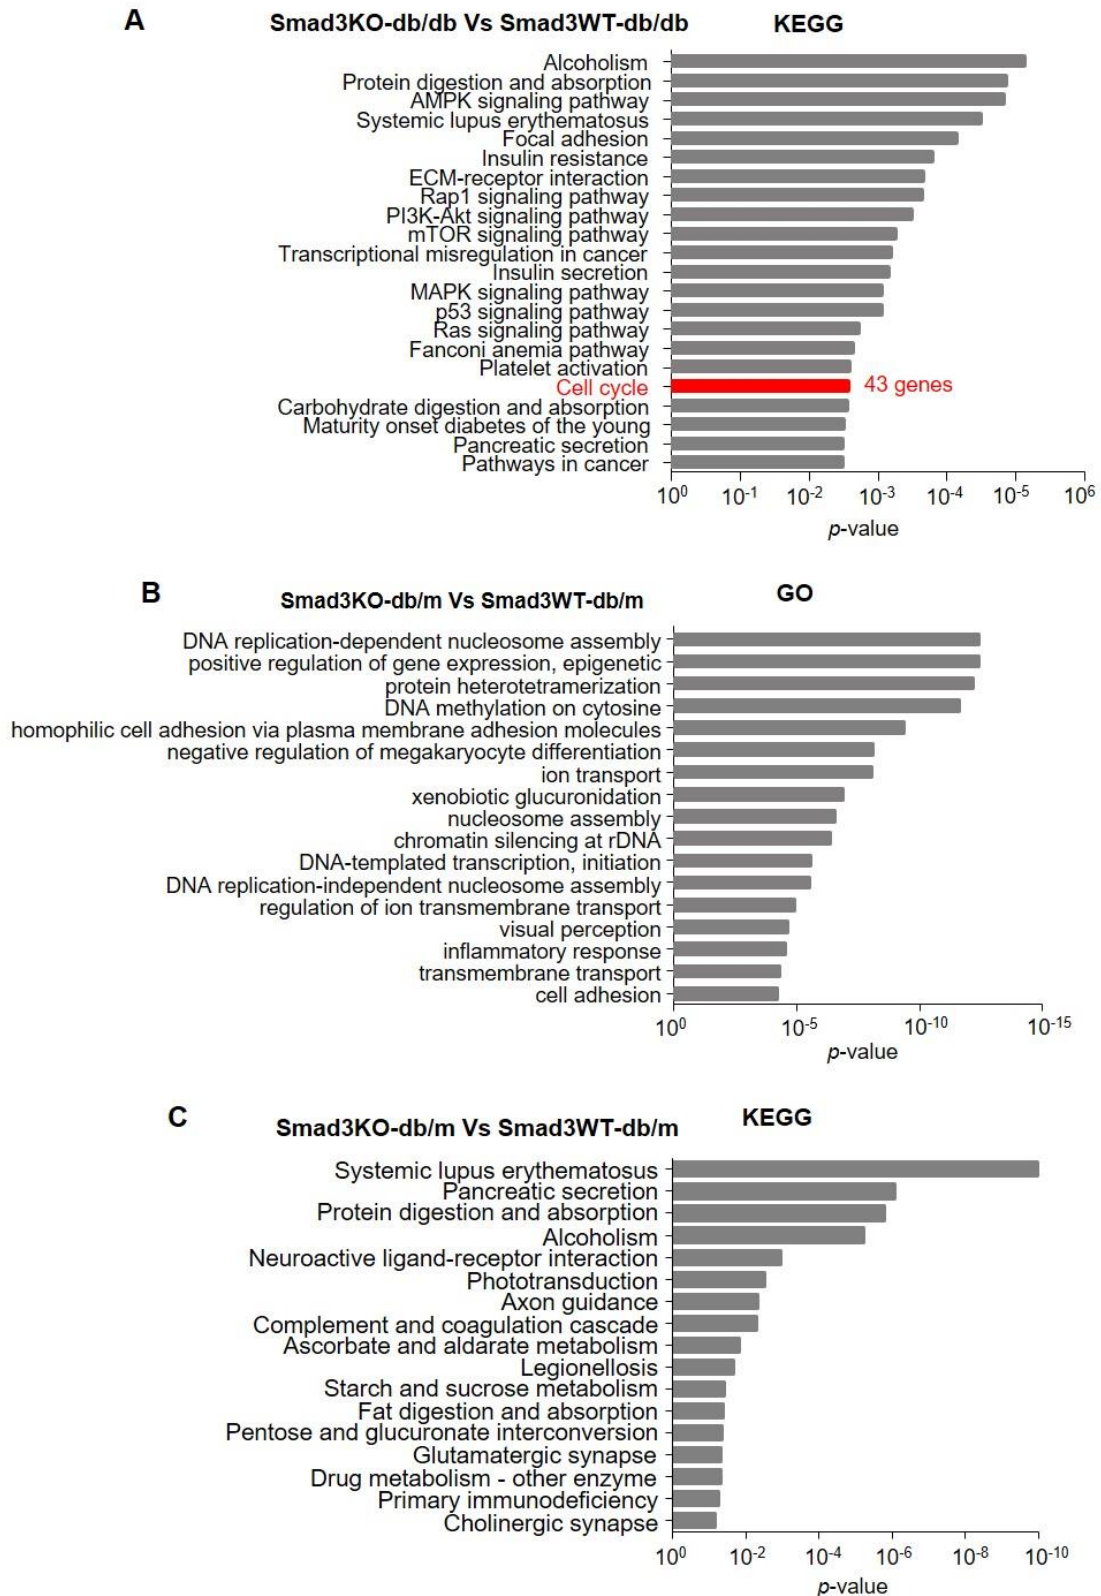

**Figure S3. Bioinformatic analysis of DEGs in islets by RNA-seq. (A)** KEGG pathway analysis of islet DEGs between Smad3WT-db/db and Smad3KO-db/db. **(B and C)** GO (GOTERM\_BP\_DIRECT subcategory) and KEGG analysis of DEGs in islets between Smad3WT-db/m and Smad3KO-db/m.

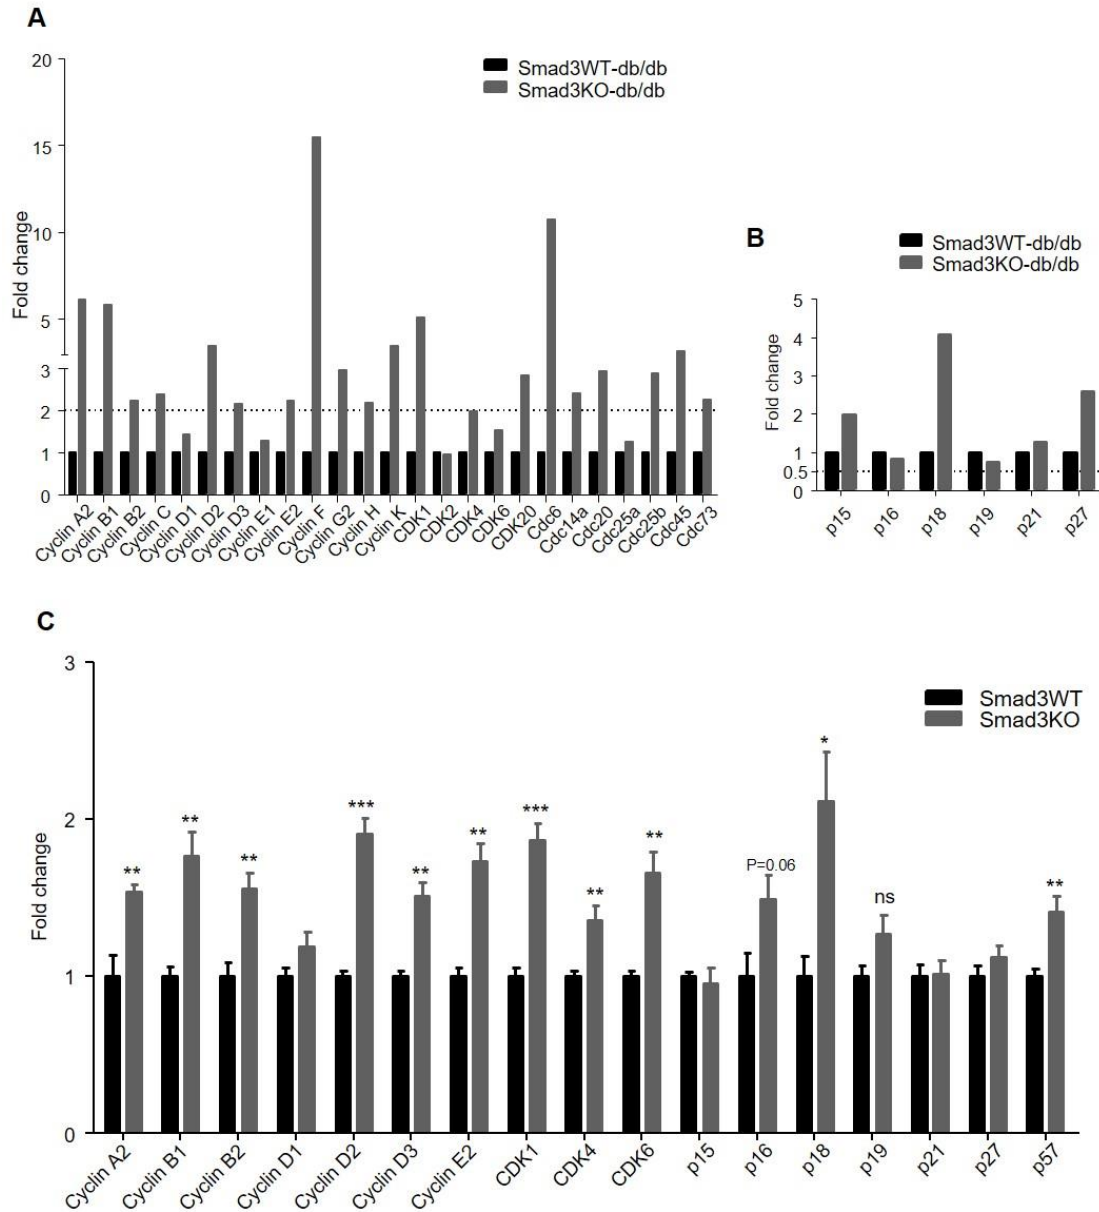

**Figure S4. Expression of cell cycle-related genes in the islets isolated from Smad3WT-db/db and Smad3KO-db/db mice, and in cultured Smad3WT and Smad3KO islet cells. (A)** Relative expression of genes associated with cyclin, CDK and CDC family revealed by RNA-seq. **(B)** Relative expression of genes from CDKI family revealed by RNA-seq. **(C)** RT-PCR detects the expression of selected cell cycle-related genes in 48 h-cultured islet cells. n = 4 culture replicates for each group. \* $p < 0.05$ , \*\* $p < 0.01$  and \*\*\* $p < 0.001$  versus Smad3WT. ns, no significance.

**Table S1. List of primers used in this study.**

| Primer name      | Sequence (forward/reverse)                      | Application |
|------------------|-------------------------------------------------|-------------|
| E2f3.ChIP RT-PCR | CATGAAGCTGCCAGGAATGA<br>TCCAACCAATGACGTGAGAG    | ChIP RT-PCR |
| E2f3.ChIP PCR    | CAGAGAGGGTGCTTGTTAGA<br>GTGTCAAAGGCAAGTTGGAC    | ChIP PCR    |
| RT.β-actin       | AGAGGGAAATCGTGCGTGAC<br>CAATAGTGATGACC TGGCCGT  | RT-PCR      |
| RT.E2F3          | AAGTCCTGAGATGCAGGTTC<br>TGAGCGGACTGTATCGACTT    | RT-PCR      |
| RT.Cyclin A2     | CTTACCCAGTACTTCCTGCA<br>CTCTGTCCTGTGACTGTGTA    | RT-PCR      |
| RT.Cyclin B1     | AGGCCGTGACAAAGGCATAA<br>GCCTAAACTCAGAAGCAACAACA | RT-PCR      |
| RT.Cyclin B2     | TTCTCTGATGCTCTGCTCTG<br>ACAGAGTTTCCTGCAGAAGC    | RT-PCR      |
| RT.Cyclin D1     | ATCTGCATCACCCCTGAGAGT<br>GCTGTGGCTTTTCAGCAAAG   | RT-PCR      |
| RT.Cyclin D2     | GTTCCTAAGAACCAGGCAGC<br>GGTCACTTACCCTGCTAGCA    | RT-PCR      |
| RT.Cyclin D3     | CTGCTCTTAGAGGGAACAGCC<br>GCACCCTTAAGACCCCAACA   | RT-PCR      |
| RT.Cyclin E2     | GCTTTGGCTTCTTCTACTCG<br>GTTGACACAGTCCTCATCTC    | RT-PCR      |
| RT.CDK1          | CAACAGAACCATCGCACTGA<br>AGCAGGCTGTTTAGAGGCTA    | RT-PCR      |
| RT.CDK4          | CTTTGCAGAGATGTTCCGTC<br>GGTCAGCATTTCCAGTAGCA    | RT-PCR      |
| RT.CDK6          | AGCTTCTAGAGGCTTCAGCA<br>GGTAAGATGCAGGAAGATGC    | RT-PCR      |
| RT.p15           | GAAGACTGCAAGCACGAAGA<br>AGCTGCAGAAAATGCGTAGG    | RT-PCR      |
| RT.p16           | GACATCAAGACATCGTGCGA<br>GGATTTAGCTCTGCTCTTGG    | RT-PCR      |
| RT.p18           | CCTTATGAAGCACACAGCCT<br>CACATTCAGTGCAGGCTTGT    | RT-PCR      |
| RT.p19           | CTAGAGTTCTGATCCAGCTC<br>CCAGAAGCATAGTGGATACC    | RT-PCR      |
| RT.p21           | AGGCATATCTAGGCACTTGC<br>CCACACACCATAGAATGCTC    | RT-PCR      |
| RT.p27           | TCTCAGGCAAACCTCTGAGGA<br>AGAATCTTCTGCAGCAGGTC   | RT-PCR      |
| RT.p57           | GCAAACGTCTGAGATGAGTT<br>TCCTTGACATGGTACAGAG     | RT-PCR      |

**Table S2. List of antibodies used in this study.**

| <b>Antibody</b>                                            | <b>Company</b>    | <b>Catalog No.</b> | <b>Application</b> |
|------------------------------------------------------------|-------------------|--------------------|--------------------|
| <b>Primary antibody</b>                                    |                   |                    |                    |
| Rabbit anti-Smad3 ChIP grade                               | Abcam, USA        | ab28379            | ChIP, IP           |
| Rabbit anti-PCNA                                           | Santa Cruz        | Sc-7907            | WB, F-IHC          |
| Rabbit anti-E2F3                                           | Abcam             | ab50917            | WB, IHC            |
| Mouse anti-BrdU                                            | Dako              | M0744              | F-IHC              |
| Alexa Fluor 488-conjugated insulin monoclonal antibody     | eBioscience       | 53-9769-82         | F-IHC, F-ICC       |
| Rabbit anti-insulin                                        | Abcam             | ab181547           | F-IHC, F-ICC       |
| Rabbit anti-Coll1a1                                        | Cell Signaling,   | 72026              | IHC                |
| <b>Secondary antibody</b>                                  |                   |                    |                    |
| DyLight™ 800 conjugated goat anti-rabbit IgG (H&L)         | RockLand, USA     | 611-145-002        | WB                 |
| DyLight™ 680 conjugated sheep anti-mouse IgG (H&L)         | RockLand, USA     | 610-644-002        | WB                 |
| DyLight™ 800 conjugated rabbit anti-mouse IgG (H&L)        | RockLand, USA     | 610-445-002        | WB                 |
| Rhodamine-conjugated Goat Anti-Mouse IgG Antibody          | Merck Minipore    | AP124R             | F-IHC, F-ICC       |
| Donkey anti-Rabbit IgG Secondary Antibody, Alexa Fluor 488 | Thermo Scientific | A21206             | F-IHC, F-ICC       |
| Mouse anti-Rabbit IgG HRP (Light-chain specific)           | Abmart            | M21006             | WB (after IP)      |

Note: ChIP, chromatin immunoprecipitation. WB, Western blot. IHC, immunohistochemistry. F-IHC, fluorescent immunohistochemistry. F-ICC, fluorescent immunocytochemistry. IP, immunoprecipitation.
